# Supplementary material
Source: PubMed Central journal article supplement (PMC2937375)
Supplement: supp_192_17_4504__1.pdf [file supp_192_17_4504__1.pdf]

# Supplemental Figure 1

## Comparative growth curves corresponding to Figure 7: measured by absorbance or fluorescence

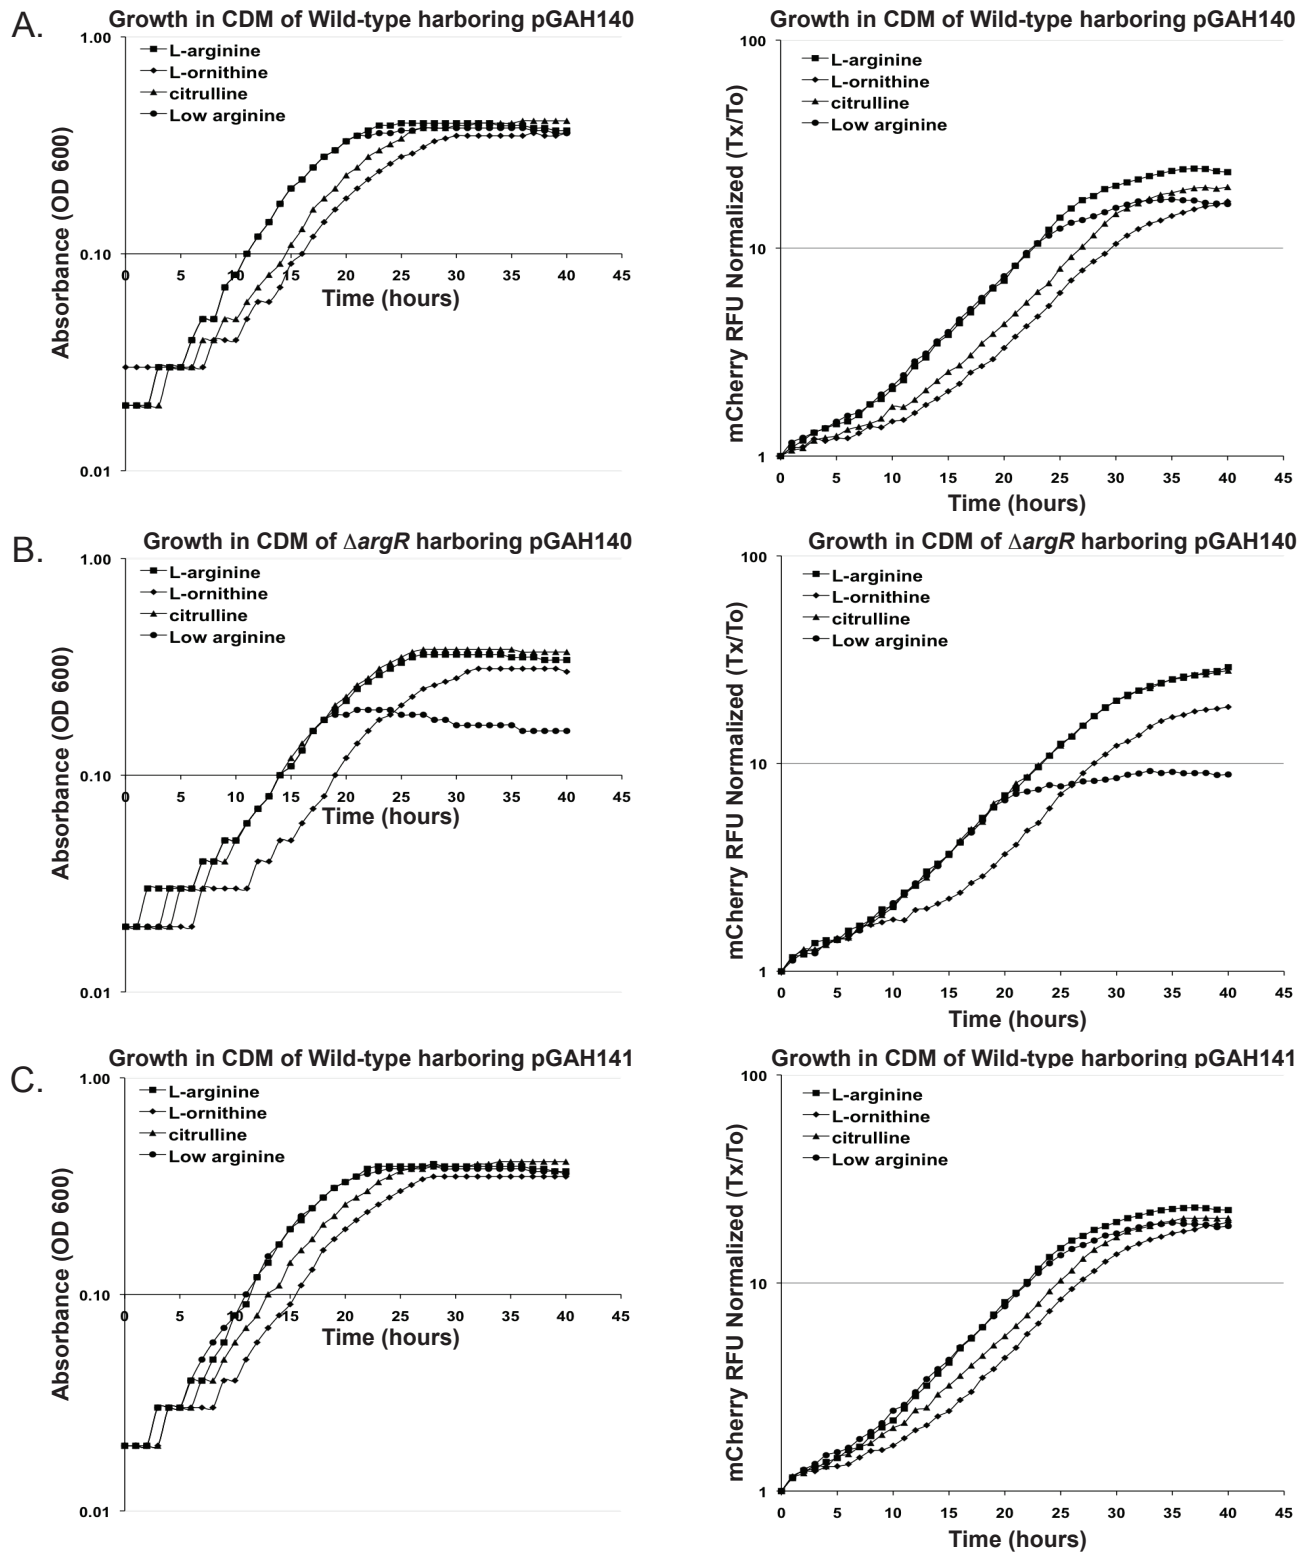

**Figure Legend:** Growth of wild-type and  $\Delta argR$  strains bearing transcriptional reporter plasmids the pGAH140 or pGAH141 in CDM prepared with either L-arginine (1.0 mg/ml), with a reduced concentration of L-arginine, termed “Low arginine” (0.1 mg/ml), without L-arginine but including L-ornithine (1.0 mg/ml), or without L-arginine but including citrulline (1.0 mg/ml) measured by both absorbance (OD 600 nm), Left panels, and fluorescence (mCherry RFU normalized to Time zero), Right panels. Growth data are shown for wild-type (GAH349) (A), and  $\Delta argR$  mutant strains bearing the *P491* reporter plasmid pGAH140 and wild-type (GAH350) bearing the *P491* $\Delta O$  reporter plasmid pGAH141. Data correspond directly with that shown in Figure 7. Absorbance, GFP RFU, and mCherry RFU data were obtained using a TECAN Infinite M200 microplate spectrofluorometer. The mCherry data shown in the Right panels was used in the normalization of the data shown in figure 7.
