# Supplementary material
Source: PubMed Central journal article supplement (PMC2937375)
Supplement: supp_192_17_4504__3.pdf [file supp_192_17_4504__3.pdf]

Supplemental Table 1. ArgR affected genes<sup>†</sup>

| ORF            | Predicted Protein                                       | Gene          | Category                            | Ratio* E Phase<br>$\Delta argR$ / wild-type | Ratio* PE Phase<br>$\Delta argR$ / wild-type |
|----------------|---------------------------------------------------------|---------------|-------------------------------------|---------------------------------------------|----------------------------------------------|
| <i>lpg0064</i> | hypothetical                                            | -             | Function Unknown                    | 0.097                                       | -1.502                                       |
| <i>lpg0069</i> | tRNA-Asn                                                | -             | tRNA                                | -0.270                                      | -1.578                                       |
| <i>lpg0076</i> | conserved hypothetical protein                          | -             | Function Unknown                    | 0.737                                       | 1.714                                        |
| <i>lpg0112</i> | hypothetical protein                                    | -             | Function Unknown                    | -0.517                                      | -1.541                                       |
| <i>lpg0154</i> | ORF                                                     | -             | Function Unknown                    | -0.169                                      | -1.899                                       |
| <i>lpg0173</i> | transcriptional regulator, LysR                         | -             | Transcription & Signal Transduction | -0.082                                      | -1.714                                       |
| <i>lpg0174</i> | pyoverdine biosynthesis protein, PvcA                   | <i>pvcA</i>   | Transport & Binding                 | 0.557                                       | -5.528                                       |
| <i>lpg0175</i> | pyoverdine biosynthesis protein, PvcB                   | <i>pvcB</i>   | Transport & Binding                 | 0.593                                       | -4.021                                       |
| <i>lpg0177</i> | chloramphenicol resistance protein                      | -             | Transport & Binding                 | 1.200                                       | -3.879                                       |
| <i>lpg0179</i> | O-methyltransferase                                     | -             | Function Unknown                    | -1.290                                      | -2.419                                       |
| <i>lpg0209</i> | ORF                                                     | -             | Function Unknown                    | 0.311                                       | 1.751                                        |
| <i>lpg0218</i> | phosphoribosylaminoimidazole carboxylase                | <i>purE</i>   | Nucleotide Metabolism               | 0.319                                       | -1.760                                       |
| <i>lpg0227</i> | Ceg7                                                    | <i>ceg7</i>   | Icm/Dot Translocated Substrates     | -0.076                                      | -1.578                                       |
| <i>lpg0239</i> | 4-aminobutyrate aminotransferase                        | <i>gabT</i>   | Amino Acid Metabolism               | 0.504                                       | 1.547                                        |
| <i>lpg0286</i> | oxidoreductase                                          | -             | Function Unknown                    | 0.028                                       | 1.761                                        |
| <i>lpg0438</i> | ORF                                                     | -             | Function Unknown                    | 0.456                                       | 1.812                                        |
| <i>lpg0443</i> | IcmR                                                    | <i>icmR</i>   | Transport & Binding                 | 0.298                                       | 1.830                                        |
| <i>lpg0444</i> | IcmQ                                                    | <i>icmQ</i>   | Transport & Binding                 | 0.186                                       | 1.645                                        |
| <i>lpg0452</i> | IcmG (DotF)                                             | <i>icmG</i>   | Transport & Binding                 | 0.035                                       | 1.625                                        |
| <i>lpg0460</i> | phosphoribosylamineimidazolecarboxamide                 | <i>purH</i>   | Nucleotide Metabolism               | 0.316                                       | 1.580                                        |
| <i>lpg0463</i> | acetyl CoA carboxylase                                  | -             | Carbohydrate Metabolism             | -0.680                                      | 2.395                                        |
| <i>lpg0482</i> | endo-1,4 beta-glucanase                                 | -             | Protein Fate                        | -0.025                                      | 2.344                                        |
| <i>lpg0483</i> | ankyrin repeat protein, LegA12                          | <i>legA12</i> | Icm/Dot Translocated Substrates     | -0.075                                      | -1.914                                       |
| <i>lpg0491</i> | amino acid ABC transporter, periplasmic binding protein | -             | Transport & Binding                 | 7.591                                       | 5.103                                        |
| <i>lpg0492</i> | amino acid ABC transporter, permease                    | <i>yqiY</i>   | Transport & Binding                 | 7.923                                       | 5.200                                        |
| <i>lpg0493</i> | amino acid ABC transporter, ATP binding component       | -             | Transport & Binding                 | 7.291                                       | 4.744                                        |
| <i>lpg0494</i> | argininosuccinate synthase                              | <i>argG</i>   | Amino Acid Metabolism               | 7.144                                       | 3.883                                        |
| <i>lpg0495</i> | argininosuccinate lyase                                 | <i>argH</i>   | Amino Acid Metabolism               | 5.494                                       | 3.907                                        |
| <i>lpg0496</i> | ornithine carbamoyltransferase                          | <i>argF</i>   | Amino Acid Metabolism               | 5.012                                       | 3.573                                        |
| <i>lpg0497</i> | adenosine deaminase                                     | -             | Nucleotide Metabolism               | -0.350                                      | 2.196                                        |
| <i>lpg0516</i> | conserved hypothetical protein                          | -             | Function Unknown                    | -0.392                                      | -1.625                                       |

|                |                                              |               |                                    |        |        |
|----------------|----------------------------------------------|---------------|------------------------------------|--------|--------|
| <i>lpg0517</i> | COG0656: aldo/keto reductases                | <i>ytbE</i>   | Function Unknown                   | 0.467  | 1.696  |
| <i>lpg0565</i> | spore maturation protein B                   | -             | Motility & Cell Division           | 0.031  | -2.327 |
| <i>lpg0634</i> | ORF                                          | -             | Icm/Dot Translocated Substrates    | 0.016  | -1.671 |
| <i>lpg0659</i> | ABC transporter ElsE, ATP binding protein    | -             | Transport & Binding                | 0.596  | -2.066 |
| <i>lpg0674</i> | adenylate cyclase                            | -             | Nucleotide Metabolism              | -0.064 | -1.612 |
| <i>lpg0688</i> | Hsp60, 60K heat shock protein                | <i>htpB</i>   | Detoxification & Stress Adaptation | -0.235 | 1.595  |
| <i>lpg0707</i> | membrane protein                             | -             | Function Unknown                   | 0.836  | 2.246  |
| <i>lpg0711</i> | imidazolonepropionase                        | <i>hutI</i>   | Amino Acid Metabolism              | 0.531  | -2.468 |
| <i>lpg0854</i> | ORF                                          | -             | Function Unknown                   | 0.072  | 1.547  |
| <i>lpg0882</i> | small ORF (144aa)                            | -             | Function Unknown                   | 0.045  | -1.971 |
| <i>lpg0884</i> | ORF hypothetical                             | -             | Function Unknown                   | 0.440  | 1.757  |
| <i>lpg0913</i> | MraZ protein                                 | <i>mraZ</i>   | Motility & Cell Division           | 0.475  | 2.346  |
| <i>lpg0931</i> | type IV pilus biogenesis protein, PilQ       | <i>pilQ</i>   | Transport & Binding                | 2.195  | 0.338  |
| <i>lpg0968</i> | ORF                                          | -             | Function Unknown                   | -0.585 | -2.380 |
| <i>lpg0977</i> | single strand DNA binding protein, Ssb       | <i>ssB</i>    | Replication & Repair               | -0.125 | -1.637 |
| <i>lpg0984</i> | ORF hypothetical                             | -             | Function Unknown                   | 1.051  | 1.505  |
| <i>lpg1035</i> | copper efflux ATPase                         | <i>copA</i>   | Transport & Binding                | -1.189 | 1.772  |
| <i>lpg1058</i> | polyhydroxyalkanoic synthase                 | <i>phbC</i>   | Amino Acid Metabolism              | 1.545  | 2.908  |
| <i>lpg1131</i> | cyclopropane fatty acid synthase             | <i>cfa</i>    | Lipid Metabolism                   | 0.474  | -1.519 |
| <i>lpg1156</i> | leucine aminopeptidase                       | -             | Protein Fate                       | 1.312  | 2.687  |
| <i>lpg1177</i> | riboflavin biosynthesis protein, RibD        | <i>ribD</i>   | Cofactor Metabolism                | -1.025 | -1.660 |
| <i>lpg1230</i> | hypothetical                                 | -             | Function Unknown                   | 0.923  | 3.941  |
| <i>lpg1239</i> | TraD                                         | -             | Transport & Binding                | -0.277 | -1.597 |
| <i>lpg1247</i> | LvhB10, type IV secretion system protein B10 | <i>lvhB10</i> | Transport & Binding                | 0.979  | 1.760  |
| <i>lpg1249</i> | LvhB8, conjugal transfer protein             | <i>lvhB8</i>  | Transport & Binding                | 1.043  | 1.714  |
| <i>lpg1293</i> | intracellular septation protein A            | <i>ispZ</i>   | Motility & Cell Division           | 0.497  | 1.635  |
| <i>lpg1367</i> | 1-aminocyclopropane-1-carboxylate deaminase  | -             | Carbohydrate Metabolism            | -0.399 | -2.397 |
| <i>lpg1388</i> | hypothetical                                 | -             | Function Unknown                   | 0.396  | 1.652  |
| <i>lpg1472</i> | biotin synthase, BioB                        | <i>bioB</i>   | Cofactor Metabolism                | 0.023  | -1.748 |
| <i>lpg1476</i> | hypothetical COG2331                         | -             | Function Unknown                   | 0.051  | 1.701  |
| <i>lpg1482</i> | ORF                                          | -             | Function Unknown                   | -0.480 | -1.951 |
| <i>lpg1505</i> | conserved hypothetical protein               | -             | Function Unknown                   | -0.053 | 2.007  |
| <i>lpg1511</i> | lipoate-protein ligase B                     | -             | Transport & Binding                | 0.293  | 1.562  |
| <i>lpg1527</i> | small ORF (151aa)                            | -             | Function Unknown                   | 0.680  | -1.574 |

|                |                                                  |               |                                    |        |        |
|----------------|--------------------------------------------------|---------------|------------------------------------|--------|--------|
| <i>lpg1588</i> | Coiled coils, LegC6                              | <i>legC6</i>  | Icm/Dot Translocated Substrates    | -0.288 | -1.527 |
| <i>lpg1622</i> | ORF                                              | -             | Function Unknown                   | -0.057 | -1.995 |
| <i>lpg1641</i> | acylaminoacyl peptidase                          | -             | Protein Fate                       | -0.448 | -1.753 |
| <i>lpg1667</i> | conserved hypothetical protein                   | -             | Function Unknown                   | -0.990 | -1.532 |
| <i>lpg1678</i> | phosphoribosylformylglycinamide synthase II      | <i>purL2</i>  | Nucleotide Metabolism              | 0.482  | 1.952  |
| <i>lpg1687</i> | ORF                                              | -             | Function Unknown                   | -0.575 | 3.308  |
| <i>lpg1702</i> | Coiled coils, PpeB                               | <i>ppeB</i>   | Icm/Dot Translocated Substrates    | -0.419 | -2.369 |
| <i>lpg1772</i> | hypothetical                                     | -             | Function Unknown                   | 0.809  | 1.547  |
| <i>lpg1774</i> | ribonucleoside-diphosphate reductase             | <i>nrdA</i>   | Nucleotide Metabolism              | 0.040  | 1.624  |
| <i>lpg1851</i> | ORF                                              | <i>lem14</i>  | Icm/Dot Translocated Substrates    | -0.174 | -2.104 |
| <i>lpg1905</i> | ectonucleoside triphosphate diphosphohydrolase I | -             | Nucleotide Metabolism              | 1.110  | 1.713  |
| <i>lpg1948</i> | leucine-rich repeat, coiled-coil                 | <i>legLC4</i> | Icm/Dot Translocated Substrates    | 0.483  | -2.459 |
| <i>lpg1986</i> | ORF                                              | -             | Function Unknown                   | -0.803 | -1.843 |
| <i>lpg2031</i> | arginyl tRNA synthetase                          | <i>argS</i>   | Amino Acid Metabolism              | 0.357  | 1.505  |
| <i>lpg2135</i> | chemiosmotic efflux system protein B             | -             | Transport & Binding                | 0.931  | -1.954 |
| <i>lpg2137</i> | Serine/Threonine Kinase, LegK2                   | <i>legK2</i>  | Icm/Dot Translocated Substrates    | 0.486  | -1.530 |
| <i>lpg2191</i> | global stress protein, GspA                      | <i>ibpA</i>   | Detoxification & Stress Adaptation | 2.618  | -0.398 |
| <i>lpg2200</i> | CegC4                                            | <i>cegC4</i>  | Icm/Dot Translocated Substrates    | 0.055  | -1.675 |
| <i>lpg2221</i> | ORF                                              | -             | Function Unknown                   | 1.028  | 2.895  |
| <i>lpg2229</i> | saframycin Mx1 synthetase B                      | -             | Secondary Metabolites              | 0.170  | 1.566  |
| <i>lpg2246</i> | ORF                                              | -             | Function Unknown                   | -1.195 | -1.669 |
| <i>lpg2305</i> | Smr domain protein                               | -             | Protein Fate                       | 2.206  | 1.433  |
| <i>lpg2327</i> | CG18304 gene product                             | -             | Icm/Dot Translocated Substrates    | 0.746  | -2.301 |
| <i>lpg2391</i> | Rtx toxin/lipase                                 | <i>sdbC</i>   | Icm/Dot Translocated Substrates    | 0.308  | -1.564 |
| <i>lpg2409</i> | Ceg29                                            | <i>ceg29</i>  | Icm/Dot Translocated Substrates    | 0.128  | -1.704 |
| <i>lpg2410</i> | patatin-like phospholipase                       | <i>vpdA</i>   | Icm/Dot Translocated Substrates    | -0.484 | -1.692 |
| <i>lpg2424</i> | ORF                                              | -             | Function Unknown                   | 0.109  | -1.614 |
| <i>lpg2445</i> | 161aa ORF, serpentine receptor                   | -             | Function Unknown                   | 1.510  | -1.632 |
| <i>lpg2493</i> | small heat shock protein, HspC2                  | <i>hspC2</i>  | Detoxification & Stress Adaptation | 0.497  | -2.428 |
| <i>lpg2510</i> | SdcA                                             | <i>sdcA</i>   | Icm/Dot Translocated Substrates    | -0.385 | -1.665 |
| <i>lpg2511</i> | PI(4)P binding, SidC                             | <i>sidC</i>   | Icm/Dot Translocated Substrates    | 0.524  | -1.703 |
| <i>lpg2532</i> | aspartate aminotransferase                       | -             | Amino Acid Metabolism              | -0.475 | -2.339 |
| <i>lpg2579</i> | small ORF (137aa)                                | -             | Function Unknown                   | -0.418 | 1.612  |
| <i>lpg2587</i> | probable thermolabile hemolysin                  | -             | Pathogenic functions               | -1.105 | -1.910 |

|                |                                       |              |                                     |        |        |
|----------------|---------------------------------------|--------------|-------------------------------------|--------|--------|
| <i>lpg2603</i> | ORF                                   | <i>lem28</i> | Icm/Dot Translocated Substrates     | -0.506 | -1.769 |
| <i>lpg2626</i> | ORF                                   | -            | Function Unknown                    | -3.843 | 0.940  |
| <i>lpg2662</i> | pantoate-beta-alanine ligase          | <i>panC</i>  | Amino Acid Metabolism               | -0.129 | -2.167 |
| <i>lpg2665</i> | dienelactone hydrolase family protein | -            | Function Unknown                    | -0.425 | -1.589 |
| <i>lpg2681</i> | 4-hydroxy-2-oxovalerate aldolase      | -            | Carbohydrate Metabolism             | 0.624  | 1.765  |
| <i>lpg2728</i> | ORF                                   | -            | Function Unknown                    | 0.486  | -1.933 |
| <i>lpg2734</i> | sensor histidine kinase, LuxN         | <i>luxN</i>  | Transcription & Signal Transduction | 0.291  | -1.536 |
| <i>lpg2744</i> | ORF                                   | -            | Function Unknown                    | 3.378  | 1.750  |
| <i>lpg2792</i> | triosephosphate isomerase             | <i>tpiA</i>  | Carbohydrate Metabolism             | -0.651 | -1.839 |
| <i>lpg2808</i> | shikimate-5-dehydrogenase             | <i>aroE</i>  | Amino Acid Metabolism               | 0.561  | 2.100  |
| <i>lpg2827</i> | conserved hypothetical protein        | -            | Function Unknown                    | 0.970  | 2.899  |
| <i>lpg2862</i> | Coiled coils, LegC8                   | <i>legC8</i> | Icm/Dot Translocated Substrates     | 0.541  | -3.252 |
| <i>lpg2902</i> | conserved hypothetical protein        | -            | Function Unknown                    | 0.035  | 2.146  |
| <i>lpg2924</i> | lipoprotein                           | -            | Transport & Binding                 | -0.020 | 4.856  |
| <i>lpg2933</i> | oxidoreductase                        | <i>yigC</i>  | Cofactor Metabolism                 | -0.163 | -2.327 |
| <i>lpg2967</i> | superoxide dismutase                  | <i>sodB</i>  | Detoxification & Stress Adaptation  | -0.534 | -1.634 |
| <i>lpg2986</i> | ATP synthase F0, B subunit            | <i>atpF</i>  | Energy Metabolism                   | -0.462 | 2.392  |

† affected genes defined as  $\log_2$  ratio +/- 1.5 (3-fold or greater) and  $pval \leq 0.005$

\*  $\log_2$  ratio  $\Delta argR$  (GAH280) / Wt (KS79)
