# Supplementary material
Source: PubMed Central journal article supplement (PMC2937375)
Supplement: supp_192_17_4504__4.pdf [file supp_192_17_4504__4.pdf]

Supplemental Table 2. Putative ArgR binding sites

| <b>ORF</b>                      | <b>Protein</b> | <b>ARG BOX</b>           | <b>bp to Start<br/>Codon</b> | <b>E Phase<br/><math>\Delta</math>argR/wild-type</b> | <b>PE Phase<br/><math>\Delta</math>argR/wild-type</b> |
|---------------------------------|----------------|--------------------------|------------------------------|------------------------------------------------------|-------------------------------------------------------|
| <i>lpg0174</i>                  | PvcA           | TAAGtAaAATTTaTCACA       | 38                           | 0.557                                                | -5.528                                                |
| <i>lpg0179</i>                  |                | ATTGAAaTATTTtTTtCAAT     | 117                          | -1.29                                                | -2.419                                                |
| <i>lpg0443</i>                  | IcmR           | AAaGAATTAgAAagttTT       | 73                           | 0.298                                                | 1.83                                                  |
| <i>lpg0444</i>                  | IcmQ           | AAaGAtTAATTTtCATTTc      | 51                           | 0.186                                                | 1.645                                                 |
| <i>lpg0491</i>                  |                | ATTGAATATAAAATTaCTAA     | 83                           | 7.591                                                | 5.103                                                 |
| <i>lpg0491</i>                  |                | ATTGAAaTTATATcCATT       | 65                           | 7.591                                                | 5.103                                                 |
| <i>lpg1156</i>                  |                | cAaGAATATccATTCaAT       | 318                          | 1.312                                                | 2.687                                                 |
| <i>lpg1255</i>                  | LvhB3          | AAaGAATATTTTtgTgATg      | 123                          | -                                                    | -                                                     |
| <i>lpg1948</i>                  | LegLC4         | AATGAATAgAAATaaCATT      | 83                           | 0.483                                                | -2.459                                                |
| <i>lpg2031</i>                  | ArgS           | TATGAAaAAgAgcatAAT       | 22                           | 0.357                                                | 1.505                                                 |
| <i>lpg2191</i>                  | IbpA           | cGTGAAaATTTATcggAT       | 250                          | 2.618                                                | -0.398                                                |
| <i>lpg2191</i>                  | IbpA           | AAaGAATTgcTATTCAGc       | 148                          | 2.618                                                | -0.398                                                |
| <i>lpg2200</i>                  | CegC4          | TTTGtAaAAAAAaTgAAc       | 65                           | 0.055                                                | -1.675                                                |
| <i>lpg2327</i>                  |                | ATTGcAcTcAAATTaCAAA      | 87                           | 0.746                                                | -2.301                                                |
| <i>lpg2374</i>                  | LuxN           | ATTGAtTTATAAaTgAGc       | 275                          | 0.291                                                | -1.536                                                |
| <i>lpg2391</i>                  | SdbC           | ATTGtcTATAcAaatTTCtTA    | 155                          | 0.308                                                | -1.564                                                |
| <i>lpg2409</i>                  | Ceg29          | TAaGAAaAATTAaTcTAT       | 117                          | 0.128                                                | -1.704                                                |
| <i>lpg2410</i>                  | VpdA           | TTTGAATTAATAATTaCcCA     | 153                          | -0.484                                               | -1.692                                                |
| <i>lpg2493</i>                  | HspC2          | ATTGAAaATATtTTatCtAg     | 94                           | 0.497                                                | -2.339                                                |
| <i>lpg2510</i>                  | SdcA           | TTaGttTTTTAataCtGAA      | 99                           | -0.385                                               | -1.665                                                |
| <i>lpg2532</i>                  |                | ATTGAAaAgTggcTCAAc       | 187                          | -0.475                                               | -2.339                                                |
| <i>lpg2626</i>                  |                | gATGAtTAAATATatgCT       | 34                           | -3.843                                               | 0.940                                                 |
| <i>lpg2967</i>                  | SodB           | cGAGAATTAAAAATcCACc      | 98                           | 0.534                                                | -1.634                                                |
| <i>lpg2967</i>                  | SodB           | AAaGAtTATTAtacCAGc       | 125                          | 0.534                                                | -1.634                                                |
| <b><i>E. coli</i> Consensus</b> |                | <b>WNTGAATWWWATTCANW</b> |                              |                                                      |                                                       |
