# Supplementary material
Source: PubMed Central journal article supplement (PMC2937375)

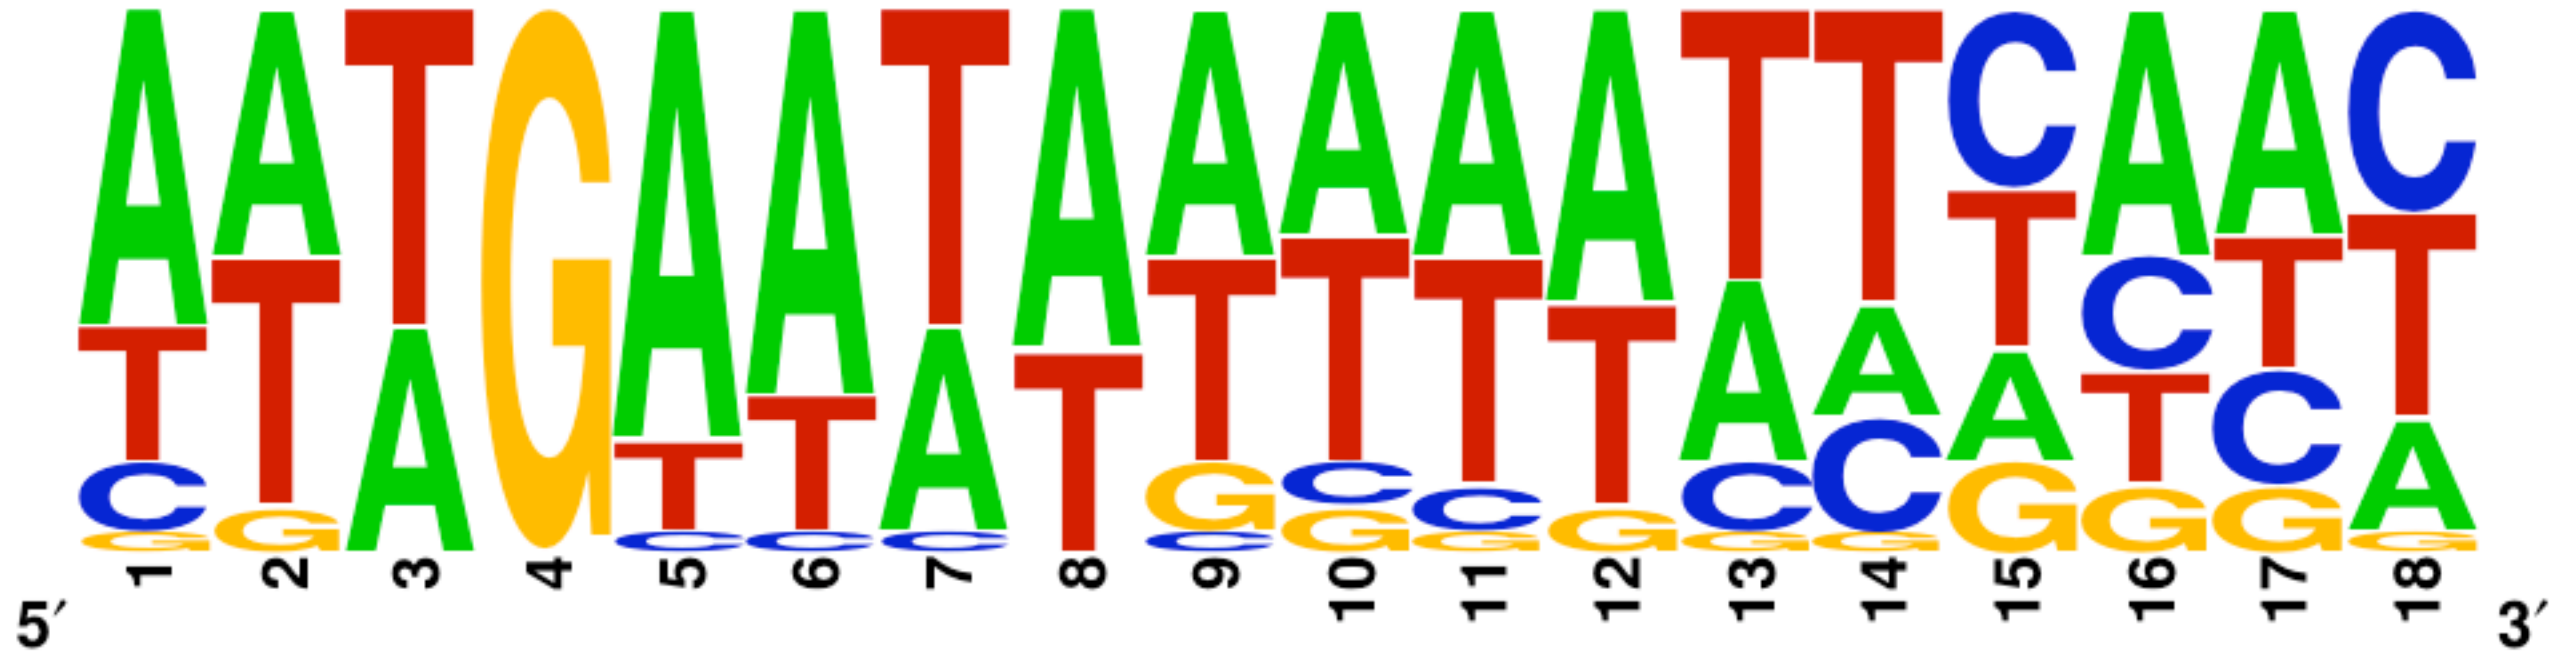

Supplement: supp_192_17_4504__2.pdf [file supp_192_17_4504__2.pdf]
